# Supplementary material for: The role of environmental filtering, geographic distance and dispersal barriers in shaping the turnover of plant and animal species in Amazonia
Source: Springer Nature journal article supplement (doi:10.1007/s10531-020-02040-3), 2020-09-02

**Supplementary Material II. Additional results obtained by analyzing data from central Amazonia, where the most restricted groups in geographic extent are. The data was trimmed to include only plots encompassed by the spatial polygon defined by the sampling plots available for palms (the most restrict group). After the removal of plots, bats, butterflies and ferns were observed only in one Endemism Zone and were excluded from the analyses.**

Table SII-1. Distance-based regression coefficients relating indices of dissimilarity in species composition of birds, fishes, ants, termites, gingers and palms to geographical and environmental distance matrices in multiple regression models in Brazilian Amazonia. Dissimilarity in species composition was measured by the pairwise Jaccard dissimilarity index based on presence and absence data. All predictor and response variables were standardized (sd = 1; mean = 0) for each individual group before analyses. Maximum temperature in the warmest month and precipitation in the driest quarter were strongly correlated with geographical distance and were not included in multiple regression models. For all taxa except bats, geographical distance was a better predictor of species dissimilarity than climatic variables (Table S3 and Fig. S3 in Supporting Information I). Significance of coefficients was calculated using permutation tests. Bold: p-value < 0.05.

|  | Birds | Fishes  (High Disp) | Fishes  (Low Disp) | Bats | Dominant  ants | Free-forager ants | Cryptic ants | Termites | Butterflies | Ferns | Gingers | Palms |
| --- | --- | --- | --- | --- | --- | --- | --- | --- | --- | --- | --- | --- |
| Distance | **0.49*** | **0.64*** | **0.37*** |  | **0.59*** | **0.54*** | **0.53*** | **0.21*** |  |  | **0.49*** | **0.49*** |
| Tree cover | 0.02 |  |  |  | ~0 | -0.02 | **-0.10*** | **0.15*** |  |  | **0.09*** | **0.14*** |
| Clay | **0.10*** |  |  |  | 0.03 | **0.14*** | **0.27*** | **0.10*** |  |  | **0.13*** | **0.23*** |
| Soil bases | **0.13*** |  |  |  | -0.01 | 0.041 | 0.08 | 0.09 |  |  | **0.11*** | **0.16*** |
| Oxygen |  | 0.06 | ~0 |  |  |  |  |  |  |  |  |  |
| pH |  | 0.10 | -0.06 |  |  |  |  |  |  |  |  |  |
| Water Temperature |  | 0.04 | -0.07 |  |  |  |  |  |  |  |  |  |
| Conductivity |  | -0.04 | 0.02 |  |  |  |  |  |  |  |  |  |
| R-squared | 0.28 | 0.51 | 0.14 |  | 0.35 | 0.30 | 0.36 | 0.08 |  |  | 0.29 | 0.33 |

Table SII-2. Association of the first Principal Coordinates Axis (PCoA) of species composition of birds, fishes, ants, termites, gingers and palms with endemism regions, soil clay content, soil bases and tree cover (environmental variables), and Latitude and Longitude (spatial variables) in Brazilian Amazonia. Coefficients were obtained by using an Analysis of Covariance (ANCOVA). Model selection was based on AICc values and only variables included in the best model for each group are shown. No spatial autocorrelation was found in model residuals.

All predictor and response variables were standardized (sd = 1; mean = 0) for each group before analyses. Bold: p-value < 0.05. R2 Exc.: (partial) R-squared explained exclusively by endemism zones, Environmental variables or Space. (-): Not sampled in Biogeographic region.

|  | Birds | Fishes  (High Disp) | Fishes  (Low Disp) | Bats | Dominant ants | Free-forager ants | Cryptic ants | Termites | Butterflies | Ferns | Gingers | Palms |
| --- | --- | --- | --- | --- | --- | --- | --- | --- | --- | --- | --- | --- |
| Inambari (intercept) | **-1.16** | - | - |  | **-1.90** | **0.64** | -1.53 | **-1.48** |  |  | **0.63** | **-0.74** |
| Guiana (intercept/contrast) | **1.78** | ~0 | ~0 |  | **2.64** | **-0.92** | 2.46 | **1.39** |  |  | **-1.82** | **1.38** |
| Napo (contrast) | - | **-** | **-** |  | - | - | - | - |  |  | - | - |
| Negro (contrast) | - |  |  |  | - | - | - | **3.86** |  |  | - | **1.83** |
| Rondonia (contrast) | - | - | - |  | - | - | **-** | - |  |  | **-** | - |
| Tapajos (contrast) | - | - | - |  | - | - | - | - |  |  | **-** | - |
| Tapajos South (contrast) | - | - | - |  | - | - | - | - |  |  | - | - |
| Clay |  |  |  |  |  |  |  | **-0.35** |  |  |  | **0.32** |
| Sum of Bases |  |  |  |  | -0.08 |  |  |  |  |  | 0.05 | **-0.08** |
| Tree Cover |  |  |  |  |  |  |  | **-0.50** |  |  | 0.04 |  |
| Oxygen |  |  |  |  |  |  |  |  |  |  |  |  |
| pH |  |  |  |  |  |  |  |  |  |  |  |  |
| Water Temperature |  |  | -0.16 |  |  |  |  |  |  |  |  |  |
| Conductivity |  | **0.16** |  |  |  |  |  |  |  |  |  |  |
| Lat | 0.10 | 0.34 | -0.92 |  | **-0.40** | **3.71** | **-2.31** | **-0.76** |  |  | **0.64** | **-0.65** |
| Long | 0.01 | 1.21 | -0.10 |  | 0.07 | **-3.69** | **2.12** | 0.12 |  |  | **-0.74** | **0.67** |
| R2 Total | 0.89 |  |  |  | 0.87 | 0.83 | 0.95 | 0.53 |  |  | 0.89 | 0.86 |
| R2 Exc. Endemism | 0.16 | ~0 | ~0 |  | 0.35 | 0.04 | 0.33 | 0.07 |  |  | 0.24 | 0.11 |
| R2 Exc. Environment | ~0 | ~0 | ~0 |  | ~0 | ~0 | ~0 | 0.27 |  |  | 0.01 | 0.01 |
| R2 Exc. Space | ~0 | 0.86 | 0.68 |  | 0.02 | 0.84 | 0.21 | 0.07 |  |  | 0.01 | 0.01 |

Fig. SII-1 - Decay of similarity in species composition with geographical distance for birds, fishes, ants, termites, gingers and palms in Brazilian Amazonia. The similarity in species composition was quantified using the Jaccard similarity index calculated for each pair of plots.


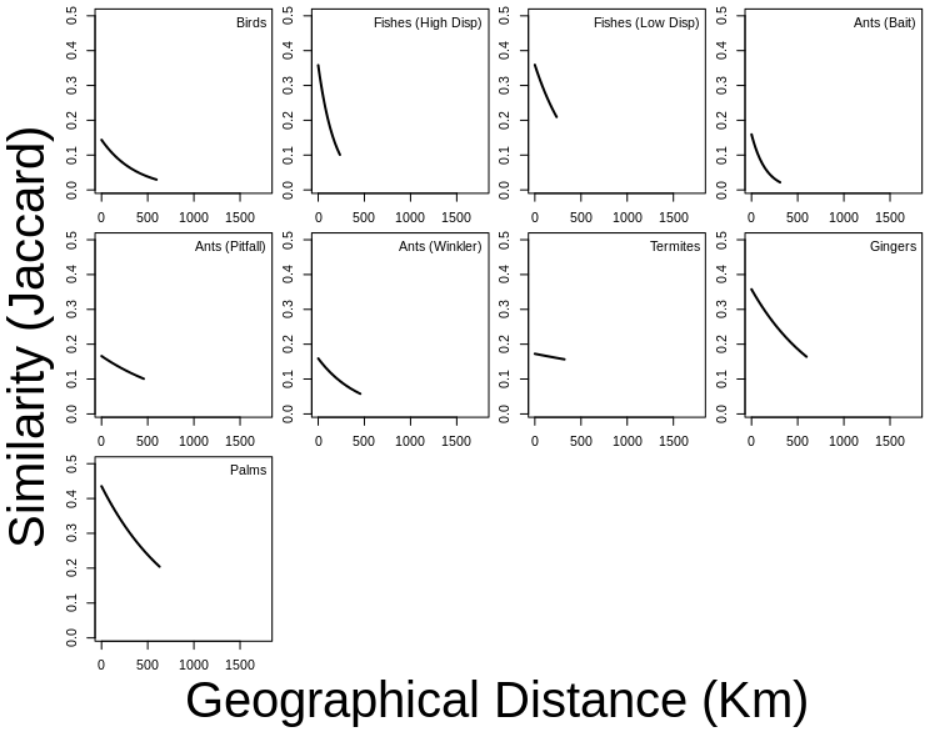


Fig. SII-2 – Venn diagrams showing the relative contributions (r2) of three groups of explanatory distance matrices (purple: endemism area; green: environment; gray: geographic distance/climate) to explaining the variation in community compositional dissimilarities (Jaccard index) of birds, fishes, ants, termites, gingers and palms in Brazilian Amazonia. Relative contributions were determined using multiple regressions on distance matrices. Overlapped areas represent the amount of variance in the response variable that was jointly explained by two or more groups of factors. Environmental distance matrices were calculated separately for each individual predictor variable: tree cover, soil clay concentration, and the sum of exchangeable cations (for terrestrial taxa), and for dissolved oxygen in the water, pH, temperature, and conductivity (for fishes).


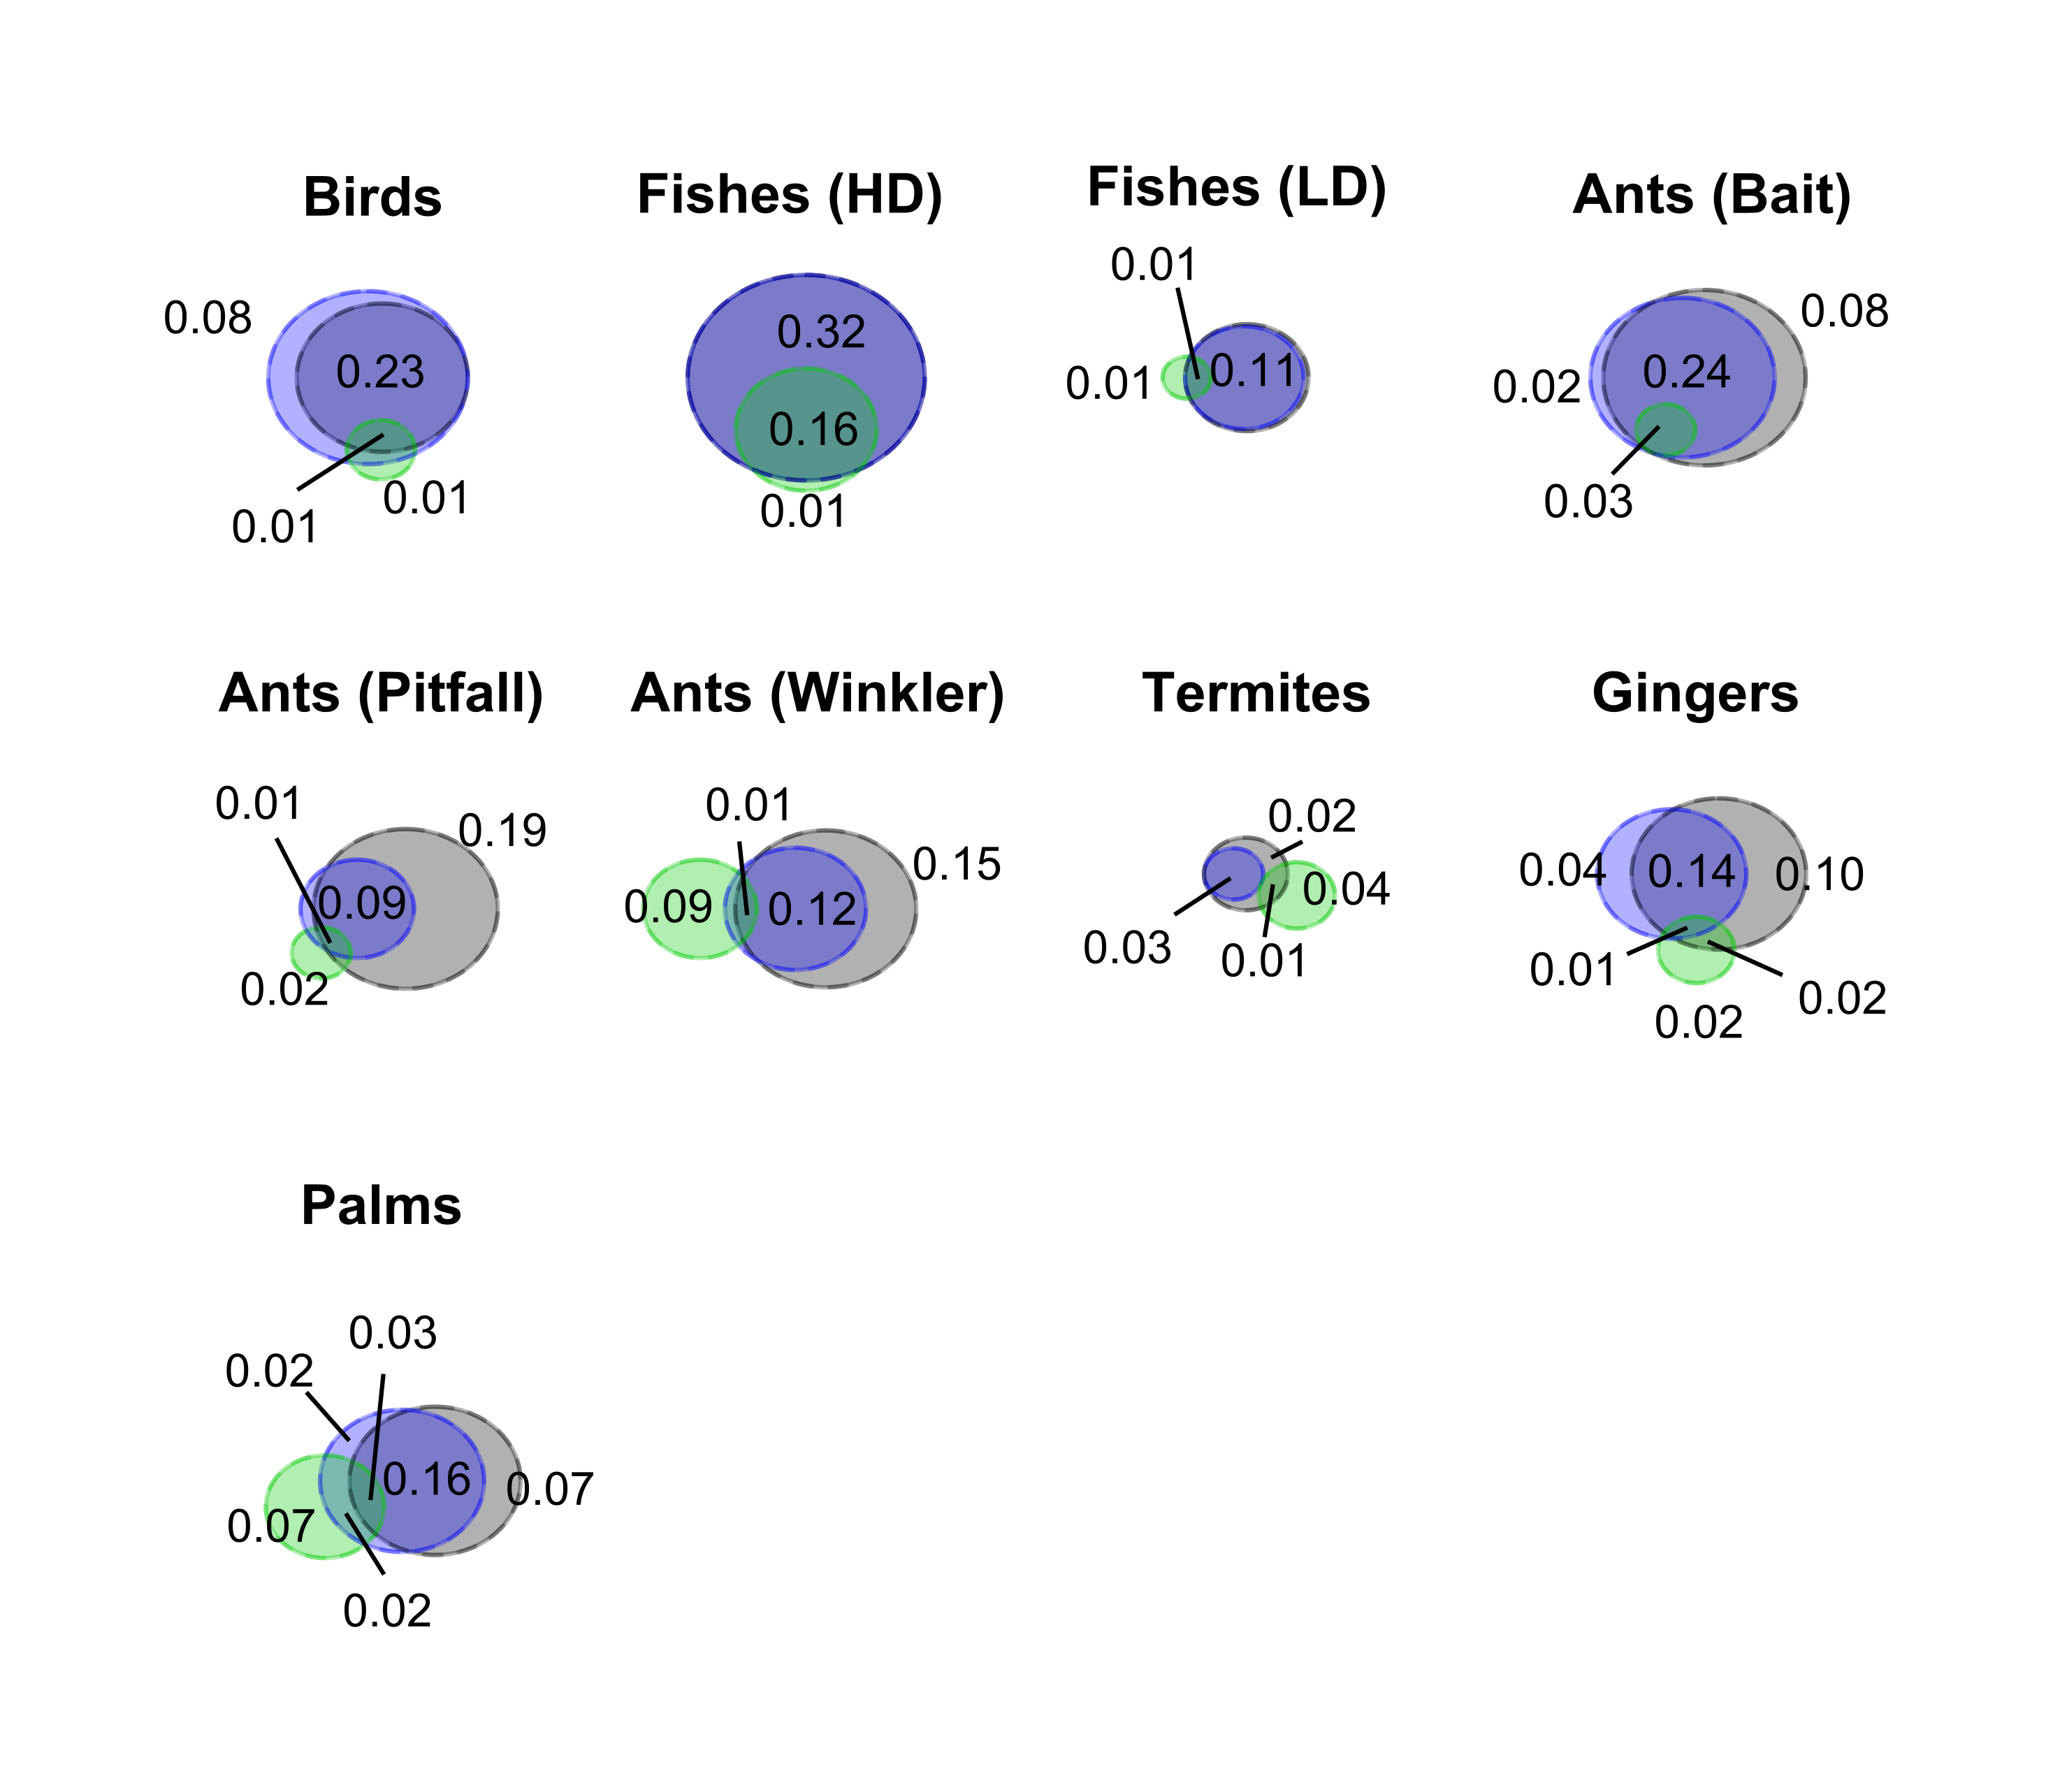


Fig. SII-3 - Ordination plots using the first two axes of Principal Coordinates Analyses (PCoA) to summarize similarities in assemblages of birds, fishes, ants, termites, gingers and palms communities in each plot in Brazilian Amazonia. Colors in the graphs represent the major bird endemism areas as defined in Cracraft (1985) with our addition of an endemism zone in the southern part of Tapajós region. The Inambari and Guiana regions, represented in red and yellow are separated by the Amazon River.


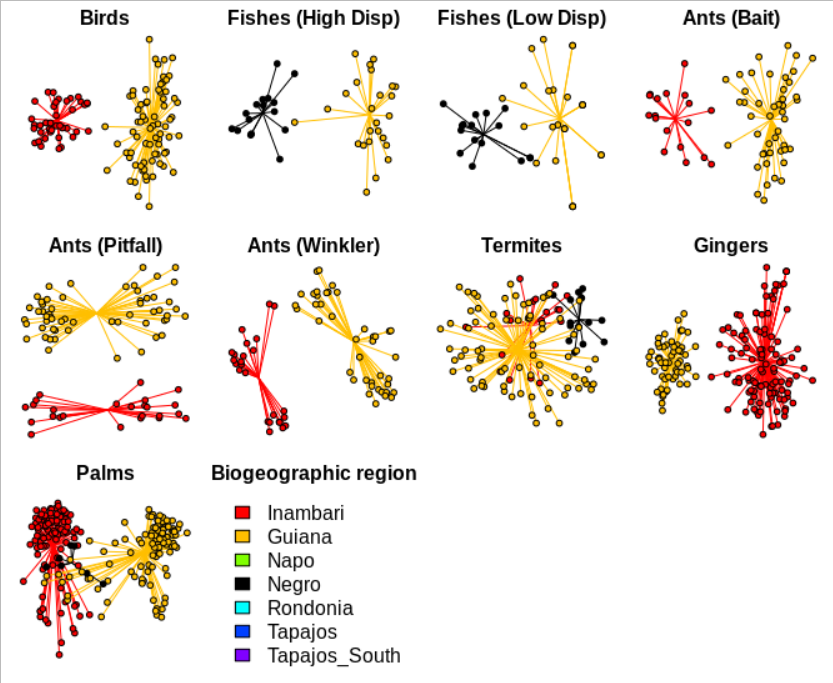


Fig. SII-4 - Means and standard deviations of the differences in community composition of birds, fishes, ants, termites, gingers and palms among endemism regions in Brazilian Amazonia. Differences were estimated as the difference between values of PCoA first axis of all possible pairs of plots established in different endemism areas. Red symbols represent significant differences between regions in posteriori Tukey Test. Guiana and Inambari (bottom) are the most represented regions separated by the Amazon river in the data.


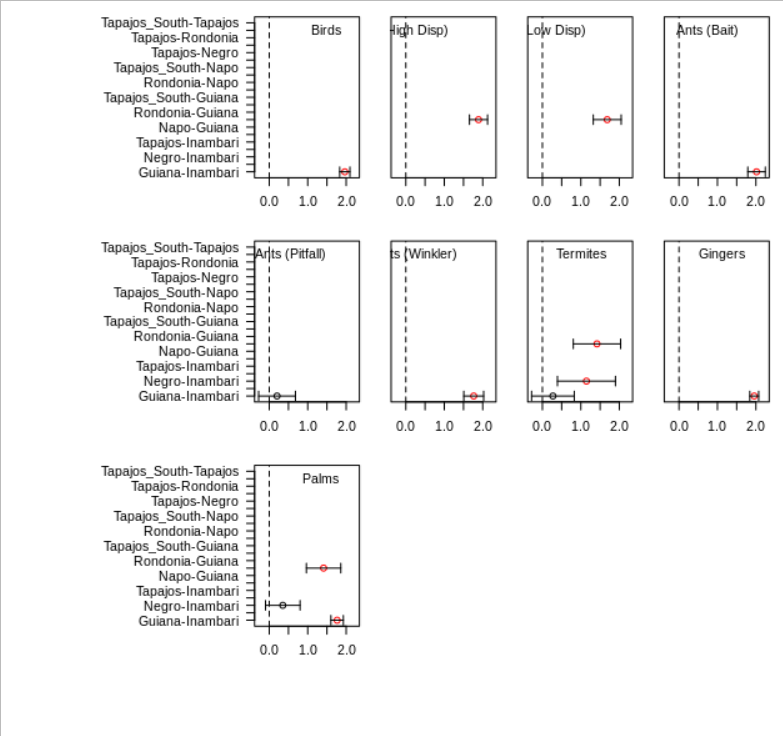

Supplement: MOESM2 [file 18342996]
